# Supplementary material for: Environmental Impact of an Innovative Aeronautic Carbon Composite Manufactured via Heated Vacuum-Assisted Resin Transfer Molding
Source: MDPI journal article supplement (doi:10.3390/su16083253), 2024-04-13
Supplement: s1 [file s1]

## Supplementary Material

### Environmental impact of an innovative aeronautic carbon composite manufactured via heated vacuum-assisted resin transfer moulding

**Table S1.** Proxies and references used to model the life cycle inventory (LCI) data (inputs and outputs) for the different scenarios.

| Material      | Proxies             | References                           |
|---------------|---------------------|--------------------------------------|
| Carbon fibre  | -                   | Based on [1]                         |
| Acetone       | -                   | -                                    |
| Release Agent | Organic chemical    | Based on [2]                         |
| Resin         | Epoxy resin         | Based on the product technical sheet |
| Mould cleaner | Methyl ethyl ketone | Based on [2]                         |
| Peel Ply      | Nylon 6-6           | Based on [3]                         |
| Vacuum Bag    | Nylon 6-6           | Based on [4]                         |
| Hoses         | Polyamide           | Based on [5]                         |
| Flow mesh     | Polypropylene       | Based on [3]                         |
| Paper Tape    | Tissue paper        | Based on [6]                         |
| Cloth         | Nonwoven polyester  | Based on the product technical sheet |
| Spiral Tubes  | Polyethylene        | Based on [7]                         |
| Release Film  | Tetrafluoroethylene | Based on the product technical sheet |
| Breather      | Nonwoven polyester  | Based on the product technical sheet |
| Yellow Tape   | Synthetic rubber    | Based on the product technical sheet |
| Blue Tape     | Silicon product     | Based on the product technical sheet |
| Electricity   | Medium voltage      | -                                    |
| Residues      | Waste plastic       | -                                    |

Note: The environmental data regarding the material and proxies was retrieved from EcolInvent 3.8.

**Table S2.** LCI of the inputs and outputs to process 1 kg of residues by Mild hydrolysis.

| Process steps   | Input            | Quantity | Unit | Output           | Quantity | Unit |
|-----------------|------------------|----------|------|------------------|----------|------|
| Transportation  | Transport        | 1.15E-04 | tkm  | -                | -        | -    |
|                 | Residues         | 1.00     | kg   | Wastewater       | 1.35     | kg   |
|                 | Water            | 1.35     | kg   | Plastic Residues | 0.460    | kg   |
| Mild hydrolysis | Acetic acid      | 0.45     | kg   | Carbon fibres    | 0.540    | kg   |
|                 | Sodium Hydroxide | 0.036    | kg   | -                | -        | -    |
|                 | Electricity      | 1.80     | kWh  | -                | -        | -    |

**Table S3.** LCI of the inputs and outputs to process 1 kg of residues by Supercritical hydrolysis.

| Process steps            | Input       | Quantity | Unit | Output        | Quantity | Unit |
|--------------------------|-------------|----------|------|---------------|----------|------|
| Transportation           | Transport   | 1.15E-04 | tkm  | -             | -        | -    |
|                          | Residues    | 1.00     | kg   | Wastewater    | 10.4     | kg   |
| Supercritical hydrolysis | Water       | 10.0     | kg   | Carbon fibres | 0.60     | kg   |
|                          | Natural gas | 24.7     | MJ   | -             | -        | -    |

**Table S4.** LCI of the inputs and outputs to process 1 kg of residues by Supercritical hydrolysis with heat recovery.

| Process steps                   | Input       | Quantity | Unit | Output         | Quantity | Unit |
|---------------------------------|-------------|----------|------|----------------|----------|------|
| <b>Transportation</b>           | Transport   | 1.15E-04 | tkm  | -              | -        | -    |
| <b>Supercritical hydrolysis</b> | Residues    | 1.00     | kg   | Wastewater     | 10.4     | kg   |
|                                 | Water       | 10.0     | kg   | Carbon fibres  | 0.60     | kg   |
|                                 | Natural gas | 24.7     | MJ   | Heat recovered | 22.2     | MJ   |

**Table S5.** Midpoint impacts for the production of one aeronautic composite laminate via VARTM, by phase of production.

|                       | ADP elements                | ADP fossil                  | GWP                         | ODP                         | HTP                         | FAETP                       | MAETP                       | TETP                        | POCP                                | AP                          | EP                                  |
|-----------------------|-----------------------------|-----------------------------|-----------------------------|-----------------------------|-----------------------------|-----------------------------|-----------------------------|-----------------------------|-------------------------------------|-----------------------------|-------------------------------------|
|                       | kg Sb eq                    | MJ                          | kg CO <sub>2</sub> eq       | kg CFC-11 eq                | kg 1,4-DB eq                | kg 1,4-DB eq                | kg 1,4-DB eq                | kg 1,4-DB eq                | kg C <sub>2</sub> H <sub>4</sub> eq | kg SO <sub>2</sub> eq       | kg PO <sub>4</sub> <sup>3-</sup> eq |
| Fibre cut             | 3,4x10 <sup>-05</sup>       | 1,2x10 <sup>+02</sup>       | 7,3x10 <sup>+00</sup>       | 2,5x10 <sup>-07</sup>       | 2,6x10 <sup>+00</sup>       | 2,3x10 <sup>+00</sup>       | 5,0x10 <sup>+03</sup>       | 8,7x10 <sup>-03</sup>       | 7,7x10 <sup>-03</sup>               | 5,3x10 <sup>-02</sup>       | 3,7x10 <sup>-01</sup>               |
| Technical fabrics cut | 1,5x10 <sup>-06</sup>       | 3,0x10 <sup>+01</sup>       | 1,7x10 <sup>+00</sup>       | 2,1x10 <sup>-08</sup>       | 4,0x10 <sup>-01</sup>       | 1,0x10 <sup>-01</sup>       | 2,6x10 <sup>+02</sup>       | 4,7x10 <sup>-02</sup>       | 2,8x10 <sup>-04</sup>               | 3,7x10 <sup>-03</sup>       | 1,1x10 <sup>-03</sup>               |
| Mould preparation     | 4,7x10 <sup>-06</sup>       | 9,4x10 <sup>+00</sup>       | 5,4x10 <sup>-01</sup>       | 4,9x10 <sup>-07</sup>       | 3,6x10 <sup>-01</sup>       | 3,8x10 <sup>-01</sup>       | 6,0x10 <sup>+02</sup>       | 1,3x10 <sup>-03</sup>       | 1,4x10 <sup>-04</sup>               | 1,8x10 <sup>-03</sup>       | 1,1x10 <sup>-03</sup>               |
| Resin preparation     | 6,5x10 <sup>-05</sup>       | 9,9x10 <sup>+01</sup>       | 5,7x10 <sup>+00</sup>       | 7,7x10 <sup>-07</sup>       | 9,9x10 <sup>+00</sup>       | 4,3x10 <sup>+00</sup>       | 5,7x10 <sup>+03</sup>       | 8,8x10 <sup>-03</sup>       | 2,8x10 <sup>-03</sup>               | 2,2x10 <sup>-02</sup>       | 7,7x10 <sup>-03</sup>               |
| Infusion preparation  | 4,1x10 <sup>-06</sup>       | 9,7x10 <sup>+00</sup>       | 5,9x10 <sup>-01</sup>       | 4,7x10 <sup>-08</sup>       | 3,9x10 <sup>-01</sup>       | 2,1x10 <sup>-01</sup>       | 4,4x10 <sup>+02</sup>       | 7,4x10 <sup>-04</sup>       | 1,3x10 <sup>-04</sup>               | 2,3x10 <sup>-03</sup>       | 8,9x10 <sup>-04</sup>               |
| Debulking             | 0,0x10 <sup>+00</sup>               | 0,0x10 <sup>+00</sup>       | 0,0x10 <sup>+00</sup>               |
| Infusion              | 1,1x10 <sup>-07</sup>       | 4,8x10 <sup>-01</sup>       | 9,0x10 <sup>-01</sup>       | 5,3x10 <sup>-09</sup>       | 7,3x10 <sup>-01</sup>       | 1,7x10 <sup>+00</sup>       | 1,6x10 <sup>+03</sup>       | 1,9x10 <sup>-03</sup>       | 4,6x10 <sup>-05</sup>               | 2,8x10 <sup>-04</sup>       | 3,8x10 <sup>-03</sup>               |
| Cure cycle            | 7,4x10 <sup>-08</sup>       | 3,2x10 <sup>-01</sup>       | 5,9x10 <sup>-01</sup>       | 3,5x10 <sup>-09</sup>       | 4,8x10 <sup>-01</sup>       | 1,1x10 <sup>+00</sup>       | 1,1x10 <sup>+03</sup>       | 1,3x10 <sup>-03</sup>       | 3,0x10 <sup>-05</sup>               | 1,9x10 <sup>-04</sup>       | 2,5x10 <sup>-03</sup>               |
| Electricity           | 3,1x10 <sup>-05</sup>       | 1,7x10 <sup>+02</sup>       | 1,4x10 <sup>+01</sup>       | 6,5x10 <sup>-07</sup>       | 4,6x10 <sup>+00</sup>       | 4,9x10 <sup>+00</sup>       | 2,0x10 <sup>+04</sup>       | 3,9x10 <sup>-02</sup>       | 3,5x10 <sup>-03</sup>               | 9,3x10 <sup>-02</sup>       | 2,1x10 <sup>-02</sup>               |
| <b>Total</b>          | <b>1,4x10<sup>-04</sup></b> | <b>4,3x10<sup>+02</sup></b> | <b>3,1x10<sup>+01</sup></b> | <b>2,2x10<sup>-06</sup></b> | <b>1,9x10<sup>+01</sup></b> | <b>1,5x10<sup>+01</sup></b> | <b>3,5x10<sup>+04</sup></b> | <b>1,1x10<sup>-01</sup></b> | <b>1,5x10<sup>-02</sup></b>         | <b>1,8x10<sup>-01</sup></b> | <b>4,1x10<sup>-01</sup></b>         |

**Table S6.** Midpoint impacts for the production of one aeronautic composite laminate via autoclave, by phase of production.

|                       | ADP elements                | ADP fossil                  | GWP                         | ODP                         | HTP                         | FAETP                       | MAETP                       | TETP                        | POCP                                | AP                          | EP                                  |
|-----------------------|-----------------------------|-----------------------------|-----------------------------|-----------------------------|-----------------------------|-----------------------------|-----------------------------|-----------------------------|-------------------------------------|-----------------------------|-------------------------------------|
|                       | kg Sb eq                    | MJ                          | kg CO <sub>2</sub> eq       | kg CFC-11 eq                | kg 1,4-DB eq                | kg 1,4-DB eq                | kg 1,4-DB eq                | kg 1,4-DB eq                | kg C <sub>2</sub> H <sub>4</sub> eq | kg SO <sub>2</sub> eq       | kg PO <sub>4</sub> <sup>3-</sup> eq |
| Prepreg cut           | 4,5x10 <sup>-05</sup>       | 1,2x10 <sup>+02</sup>       | 7,6x10 <sup>+00</sup>       | 4,2x10 <sup>-07</sup>       | 4,7x10 <sup>+00</sup>       | 3,1x10 <sup>+00</sup>       | 5,9x10 <sup>+03</sup>       | 1,5x10 <sup>-02</sup>       | 7,0x10 <sup>-03</sup>               | 5,0x10 <sup>-02</sup>       | 3,1x10 <sup>-01</sup>               |
| Autoclave preparation | 2,2x10 <sup>-05</sup>       | 2,1x10 <sup>+01</sup>       | 6,6x10 <sup>+00</sup>       | 1,9x10 <sup>-04</sup>       | 2,0x10 <sup>+00</sup>       | 6,5x10 <sup>-01</sup>       | 1,2x10 <sup>+04</sup>       | 2,1x10 <sup>-03</sup>       | 4,2x10 <sup>-04</sup>               | 6,3x10 <sup>-03</sup>       | 1,9x10 <sup>-03</sup>               |
| Autoclave             | 5,5x10 <sup>-08</sup>       | 2,3x10 <sup>-01</sup>       | 4,4x10 <sup>-01</sup>       | 2,6x10 <sup>-09</sup>       | 3,6x10 <sup>-01</sup>       | 8,2x10 <sup>-01</sup>       | 7,9x10 <sup>+02</sup>       | 9,4x10 <sup>-04</sup>       | 2,2x10 <sup>-05</sup>               | 1,4x10 <sup>-04</sup>       | 1,9x10 <sup>-03</sup>               |
| Final cut             | 1,4x10 <sup>-08</sup>       | 5,9x10 <sup>-02</sup>       | 1,1x10 <sup>-01</sup>       | 6,6x10 <sup>-10</sup>       | 9,0x10 <sup>-02</sup>       | 2,1x10 <sup>-01</sup>       | 2,0x10 <sup>+02</sup>       | 2,4x10 <sup>-04</sup>       | 5,7x10 <sup>-06</sup>               | 3,5x10 <sup>-05</sup>       | 4,7x10 <sup>-04</sup>               |
| Electricity           | 3,5x10 <sup>-06</sup>       | 1,9x10 <sup>+01</sup>       | 1,6x10 <sup>+00</sup>       | 7,4x10 <sup>-08</sup>       | 5,2x10 <sup>-01</sup>       | 5,5x10 <sup>-01</sup>       | 2,2x10 <sup>+03</sup>       | 4,4x10 <sup>-03</sup>       | 3,9x10 <sup>-04</sup>               | 1,0x10 <sup>-02</sup>       | 2,4x10 <sup>-03</sup>               |
| <b>Total</b>          | <b>7,1x10<sup>-05</sup></b> | <b>1,6x10<sup>+02</sup></b> | <b>1,6x10<sup>+01</sup></b> | <b>1,9x10<sup>-04</sup></b> | <b>7,7x10<sup>+00</sup></b> | <b>5,4x10<sup>+00</sup></b> | <b>2,1x10<sup>+04</sup></b> | <b>2,3x10<sup>-02</sup></b> | <b>7,8x10<sup>-03</sup></b>         | <b>6,7x10<sup>-02</sup></b> | <b>3,1x10<sup>-01</sup></b>         |

**Table S7.** Midpoint impacts for the EOL scenarios.

|                                       | ADP elements          | ADP fossil            | GWP                   | ODP                   | HTP                   | FAETP                 | MAETP                 | TETP                  | POCP                                | AP                    | EP                                  |
|---------------------------------------|-----------------------|-----------------------|-----------------------|-----------------------|-----------------------|-----------------------|-----------------------|-----------------------|-------------------------------------|-----------------------|-------------------------------------|
|                                       | kg Sb eq              | MJ                    | kg CO <sub>2</sub> eq | kg CFC-11 eq          | kg 1,4-DB eq          | kg 1,4-DB eq          | kg 1,4-DB eq          | kg 1,4-DB eq          | kg C <sub>2</sub> H <sub>4</sub> eq | kg SO <sub>2</sub> eq | kg PO <sub>4</sub> <sup>3-</sup> eq |
| <b>Mild hydrolysis</b>                | 1,1x10 <sup>-05</sup> | 2,8x10 <sup>+01</sup> | 1,8x10 <sup>+00</sup> | 2,2x10 <sup>-07</sup> | 1,1x10 <sup>+00</sup> | 1,4x10 <sup>+00</sup> | 2,6x10 <sup>-03</sup> | 4,1x10 <sup>-03</sup> | 8,0x10 <sup>-04</sup>               | 8,4x10 <sup>-03</sup> | 3,8x10 <sup>-03</sup>               |
| <b>Supercritical hydrolysis</b>       | 5,3x10 <sup>-07</sup> | 2,2x10 <sup>+01</sup> | 1,3x10 <sup>+00</sup> | 1,8x10 <sup>-07</sup> | 5,8x10 <sup>-02</sup> | 4,4x10 <sup>-02</sup> | 7,1x10 <sup>-01</sup> | 3,1x10 <sup>-04</sup> | 8,4x10 <sup>-05</sup>               | 1,0x10 <sup>-03</sup> | 3,1x10 <sup>-04</sup>               |
| <b>Supercritical hydrolysis + WHR</b> | 1,5x10 <sup>-07</sup> | 2,3x10 <sup>+00</sup> | 1,4x10 <sup>-01</sup> | 2,0x10 <sup>-08</sup> | 1,9x10 <sup>-02</sup> | 1,2x10 <sup>-02</sup> | 1,9x10 <sup>-01</sup> | 1,4x10 <sup>-04</sup> | 1,1x10 <sup>-05</sup>               | 1,6x10 <sup>-04</sup> | 1,6x10 <sup>-04</sup>               |

## References

1. Forcellese, A.; Marconi, M.; Simoncini, M.; Vita, A. Life Cycle Impact Assessment of Different Manufacturing Technologies for Automotive CFRP Components. *J. Clean. Prod.* **2020**, *271*, 122677, doi:10.1016/J.JCLEPRO.2020.122677.
2. Hill, C.; Norton, A. *LCA Database of Environmental Impact to Inform Material Selection Process*; 2018;
3. Gkoloni, N.; Kostopoulos, V. Life Cycle Assessment of Bio-Composite Laminates. A Comparative Study. *IOP Conf. Ser. Earth Environ. Sci.* **2021**, *899*, doi:10.1088/1755-1315/899/1/012041.
4. Airtech International Inc. STRETCHLON 800, Soft, Flexible Nylon Bagging Film Available online: <https://compositeenvisions.com/wp-content/uploads/2018/03/Model-1610-strtlon-800-tds.pdf> (accessed on 22 February 2023).
5. La Rosa, A.D.; Greco, S.; Tosto, C.; Cicala, G. LCA and LCC of a Chemical Recycling Process of Waste CF-Thermoset Composites for the Production of Novel CF-Thermoplastic Composites. Open Loop and Closed Loop Scenarios. *J. Clean. Prod.* **2021**, *304*, 127158, doi:10.1016/J.JCLEPRO.2021.127158.
6. EUROCEL MSK 6127 Available online: [https://www.eurocel.it/site/assets/files/2121/mk027en\\_rev02\\_msk6127.pdf](https://www.eurocel.it/site/assets/files/2121/mk027en_rev02_msk6127.pdf) (accessed on 22 February 2023).
7. Airtech International Inc. PE TUBE & SPIRAL TUBE, Low Temperature Tubing for Resin Infusion Available online: [https://catalogue.airtech-amg.co.uk/product\\_pdf.php?product\\_id=1992&lang=EN&location=2&print=1](https://catalogue.airtech-amg.co.uk/product_pdf.php?product_id=1992&lang=EN&location=2&print=1) (accessed on 22 February 2023).
